# Supplementary material for: Histone deacetylase inhibition attenuates hepatic steatosis in rats with experimental Cushing's syndrome
Source: PubMed Central journal article supplement — Korean J Physiol Pharmacol. 2017 Dec 22;22(1):23–33. doi: 10.4196/kjpp.2018.22.1.23 (PMC5746509; doi:10.4196/kjpp.2018.22.1.23), 2017-12-22
Supplement: kjpp-22-23-s001.pdf [file kjpp-22-23-s001.pdf]

**Supplementary Table 1. RT-qPCR primers (Accession No.)**

| <b>Genes (Rat)</b>                 | <b>Primer sequence (5'-3')</b>                         |
|------------------------------------|--------------------------------------------------------|
| <i>Acc</i><br>(NM_022193.1)        | F: CCG AGCAAGGGATAAGTTTG<br>R: ATGGGATGGCAGTAAGGTCA    |
| <i>Fasn</i><br>(NM_017332.1)       | F: AGACGATGACAGGAGGTGGA<br>R: GAGTGAGGCCGGGTTGATAC     |
| <i>Scd1</i><br>(NM_139192.2)       | F: ACCTTGCTCTGGGGGATATT<br>R: TTCCGCCCTTCTCTTTGACA     |
| <i>Srebp1c</i><br>(NM_001276708.1) | F: GCCGAGGTGTGCGAAATG<br>R: GCACGGACGGGTACATCTT        |
| <i>Gapdh</i><br>(NM_017008.4)      | F: GTGGACCTCATGGCCTACAT<br>R: TGTGAGGGAGATGCTCAGTG     |
| <b>Genes (human)</b>               |                                                        |
| <i>Acc</i><br>(NM_198836.2)        | F: TGGCCTCAAGAGGATTTGT<br>R: TCCACTGTTGGCTGATACATAGATG |
| <i>Fasn</i><br>(NM_004104.4)       | F: GGTCTTGAGAGATGGCTTGC<br>R: AATTGGCAAAGCCGTAGTTG     |
| <i>Scd1</i><br>(NM_005063.4)       | F: CTCCACTGCTGGACATGAGA<br>R: AATGAGTGAAGGGGCACAAC     |
| <i>Srebp1c</i><br>(NM_004176.4)    | F: CCATGGATTGCACTTTCGAA<br>R: GGCCAGGGAAGTCACTGTCTT    |
| <i>B-actin</i><br>(NM_001101.3)    | F: GGACTTCGAGCAAGAGATGG<br>R: RAGCACTGTGTTGGCGTACAG    |

**Fasn** : Fatty acid synthase

**Acc** : Acetyl-CoA carboxylase

**Scd1** : Stearoyl-CoA desaturase-1

**Srebp1c** : Sterol regulatory element binding protein 1 c
