# Supplementary material for: Histone deacetylase inhibition attenuates hepatic steatosis in rats with experimental Cushing's syndrome
Source: PubMed Central journal article supplement — Korean J Physiol Pharmacol. 2017 Dec 22;22(1):23–33. doi: 10.4196/kjpp.2018.22.1.23 (PMC5746509; doi:10.4196/kjpp.2018.22.1.23), 2017-12-22
Supplement: kjpp-22-23-s002.pdf [file kjpp-22-23-s002.pdf]

**Supplementary Table 2. qPCR primers after ChIP**

| <b>Genes (Rat)</b>  | <b>Primer sequence (5'-3')</b>                    |
|---------------------|---------------------------------------------------|
| <i>Acc</i>          | F: TCCCTTGGAGGAAACAAATG<br>R: CACAAGTGGCTTGAAACAA |
| <i>Fasn</i>         | F: GATGGCCGCGTTTAAATA<br>R: CACAAGTGGCTTGAAACAA   |
| <i>Scd1</i>         | F: TCTGCGCTTTTACCCTTTG<br>R: GAAACCTGCCCTCCTGTCTC |
| <i>Srebp1c</i>      | F: CGAACCAGCGGTAGAAACAC<br>R: TCACCGGGTGCTCTGAAT  |
| <b>Gene (human)</b> |                                                   |
| <i>Srebp1c</i>      | F: GCGAGTTACTCACGGTCAT<br>R: TGTAACCCTCGGTGCCTAA  |
